# Supplementary material for: Vertical changes in volatile organic compounds (VOCs) and impacts on photochemical ozone formation
Source: Copernicus journal article supplement (doi:10.5194/egusphere-2024-2755), 2024-10-23
Supplement: Supplementary file 1 [file egusphere-2024-2755-supplement.pdf]

# **Supporting information for “Vertical changes in volatile organic compounds (VOCs) and impacts on photochemical ozone formation”**

Xiao-Bing Li<sup>1</sup>, Bin Yuan<sup>1,\*</sup>, Yibo Huangfu<sup>1</sup>, Suxia Yang<sup>2</sup>, Xin Song<sup>1</sup>, Jipeng Qi<sup>1</sup>, Xianjun He<sup>1</sup>, Sihang Wang<sup>1</sup>, Yubin Chen<sup>1</sup>, Qing Yang<sup>1</sup>, Yongxin Song<sup>1</sup>, Yuwen Peng<sup>1</sup>, Guiqian Tang<sup>3,4</sup>, Jian Gao<sup>5</sup>, Min Shao<sup>1</sup>

<sup>1</sup> College of Environment and Climate, Institute for Environmental and Climate Research, Guangdong-Hongkong-Macau Joint Laboratory of Collaborative Innovation for Environmental Quality, Jinan University, Guangzhou 511443, China

<sup>2</sup> Guangzhou Research Institute of Environment Protection Co., Ltd., Guangzhou 510620, China

<sup>3</sup> State Key Laboratory of Atmospheric Environment and Extreme Meteorology, Institute of Atmospheric Physics, Chinese Academy of Sciences, Beijing 100029, China

<sup>4</sup> University of Chinese Academy of Sciences, Beijing, 100049, China

<sup>5</sup> State Key Laboratory of Environmental Criteria and Risk Assessment, Chinese Research Academy of Environmental Sciences, Beijing 100012, China

\* Corresponding author: Bin Yuan (byuan@jnu.edu.cn)

## Estimation of NMHC concentrations at the BMT site

In addition to the gradient measurements of trace gases on the BMT, online measurements of 56 nonmethane hydrocarbons (NMHCs) were made using a GC-MS/FID system (TH-300B, Tianhong Inc., China) with an hourly time resolution during the campaign at the Chegongzhuang site, as depicted in Fig. S1. The Chegongzhuang site is located between the Second and Third Ring Roads in downtown Beijing and is approximately 5 km southwest of the BMT site. In this study, we primarily investigated the impact of vertical variations in VOCs on atmospheric oxidation capacity and photochemical ozone formation during daytime. Therefore, the concentrations of unmeasured NMHC species at the five inlet heights were estimated only in daytime, defined as the period of 11:00-16:00 local time (UTC+8). The concentrations of NMHCs (e.g., alkanes, alkenes, and acetylene) that were not measured on the BMT could be estimated by scaling the concentrations of measured aromatic species with similar  $k_{OH}$  values. The scaling factors for a NMHC species were determined using measurements from the 56 NMHCs at the Chegongzhuang site. This approach is reasonable since vehicular exhausts and residential emissions are the predominant sources of ambient VOCs in urban Beijing. The scaling factor of a NMHC species  $R$ , denoted by  $SF$ , can be determined according to the following criteria in Eq. (S1):

$$SF_t = \begin{cases} [R]/[Benzene], & \text{if } k_{OH-R} < k_{OH-Benzene} \\ 0.5 \times \left( \frac{[R]}{[Benzene]} + \frac{[R]}{[Xylene]} \right), & \text{if } k_{OH-Benzene} < k_{OH-R} < k_{OH-Xylene} \\ 0.5 \times \left( \frac{[R]}{[Xylene]} + \frac{[R]}{[Styrene]} \right), & \text{if } k_{OH-Xylene} < k_{OH-R} < k_{OH-Styrene} \\ [R]/[Styrene], & \text{if } k_{OH-R} > k_{OH-Styrene} \end{cases} \quad \text{Eq. (S1)}$$

where  $[R]$ ,  $[Benzene]$ ,  $[Xylene]$ , and  $[Styrene]$  represent concentrations of  $R$ , xylene, and styrene;  $k_{OH-R}$ ,  $k_{OH-Benzene}$ ,  $k_{OH-Xylene}$ , and  $k_{OH-Styrene}$  represents the reaction rate coefficients between  $R$  and OH radicals, benzene, xylene, and styrene.

The concentrations of xylene isomers (o-xylene and m, p-xylene,  $m/z=107$ ) and trimethylbenzene isomers (1,2,3-, 1,2,4-, 1,3,5-trimethylbenzene,  $m/z=121$ ) were determined by scaling PTR-ToF-MS measurements using the respective concentration

ratios at the Chegongzhuang site. Similarly, the concentrations of methyl vinyl ketone (MVK) and methacrolein (MACR) were derived by scaling the PTR-ToF-MS measurements ( $m/z=121$ ) with the respective concentration ratios determined through the PTR-ToF-MS measurements conducted in  $\text{NO}^+$  mode during the campaign (Fig. S4). As reported in the literature (*Gkatzelis et al., 2021; Wang et al., 2022*), anthropogenic emissions are the primary sources of monoterpenes in urban regions. Therefore, concentrations of monoterpenes measured by the PTR-ToF-MS ( $m/z=137$ ) were allocated to  $\alpha$ -pinene,  $\beta$ -pinene, and limonene with respective fractions of 25%, 25%, and 50% (*Gkatzelis et al., 2021*).

## References

- Gkatzelis, G. I., Coggon, M. M., McDonald, B. C., Peischl, J., Gilman, J. B., Aikin, K. C., Robinson, M. A., Canonaco, F., Prevot, A. S. H., Trainer, M., and Warneke, C.: Observations Confirm that Volatile Chemical Products Are a Major Source of Petrochemical Emissions in U.S. Cities, *Environ Sci Technol*, 55, 4332-4343, [10.1021/acs.est.0c05471](https://doi.org/10.1021/acs.est.0c05471) 2021.
- Wang, H., Ma, X., Tan, Z., Wang, H., Chen, X., Chen, S., Gao, Y., Liu, Y., Liu, Y., Yang, X., Yuan, B., Zeng, L., Huang, C., Lu, K., and Zhang, Y.: Anthropogenic monoterpenes aggravating ozone pollution, *Natl Sci Rev*, 9, nwac103, [10.1093/nsr/nwac103](https://doi.org/10.1093/nsr/nwac103) 2022.

**Table S1** Summary of the VOC species and related parameters used in this study

| Type           | VOC Species            | Mean* | Median* | 5 <sup>th</sup><br>percentile<br>* | 95 <sup>th</sup><br>percentile<br>* | $k_{OH}$<br>( $\times 10^{-12}$ )** |
|----------------|------------------------|-------|---------|------------------------------------|-------------------------------------|-------------------------------------|
| NMHC           | Ethane                 | 2.083 | 1.797   | 0.658                              | 4.467                               | 0.24                                |
|                | Propane                | 2.046 | 1.617   | 0.480                              | 4.779                               | 1.10                                |
|                | Iso-butane             | 1.375 | 1.035   | 0.300                              | 3.500                               | 2.12                                |
|                | n-Butane               | 2.123 | 1.600   | 0.453                              | 5.794                               | 2.35                                |
|                | i-pentane              | 1.295 | 0.975   | 0.281                              | 3.566                               | 3.60                                |
|                | n-Pentane              | 0.528 | 0.382   | 0.101                              | 1.648                               | 3.80                                |
|                | 2,2-Dimethylbutane     | 0.044 | 0.030   | 0.010                              | 0.123                               | 2.23                                |
|                | Cyclopentane           | 0.333 | 0.228   | 0.074                              | 0.897                               | 4.97                                |
|                | 2,3-Dimethylbutane     | 0.088 | 0.061   | 0.022                              | 0.250                               | 5.78                                |
|                | 2-Methylpentane        | 0.265 | 0.204   | 0.057                              | 0.705                               | 5.20                                |
|                | 3-Methylpentane        | 0.194 | 0.151   | 0.048                              | 0.488                               | 5.20                                |
|                | n-Hexane               | 0.492 | 0.309   | 0.095                              | 1.541                               | 5.20                                |
|                | Methylcyclopentane     | 0.162 | 0.122   | 0.042                              | 0.426                               | 7.65                                |
|                | 2,4-Dimethylpentane    | 0.036 | 0.027   | 0.009                              | 0.078                               | 4.77                                |
|                | Cyclohexane            | 0.102 | 0.074   | 0.024                              | 0.321                               | 6.97                                |
|                | 2-Methylhexane         | 0.081 | 0.064   | 0.023                              | 0.190                               | 5.65                                |
|                | 2,3-Dimethylpentane    | 0.035 | 0.027   | 0.007                              | 0.085                               | 6.89                                |
|                | 3-Methylhexane         | 0.077 | 0.058   | 0.019                              | 0.197                               | 6.54                                |
|                | 2,2,4-Trimethylpentane | 0.051 | 0.043   | 0.014                              | 0.115                               | 3.34                                |
|                | n-Heptane              | 0.105 | 0.078   | 0.027                              | 0.277                               | 6.76                                |
|                | Methylcyclohexane      | 0.070 | 0.052   | 0.015                              | 0.223                               | 9.64                                |
|                | 2,3,4-Trimethylpentane | 0.022 | 0.017   | 0.004                              | 0.058                               | 6.60                                |
|                | 2-Methylheptane        | 0.026 | 0.020   | 0.006                              | 0.071                               | 12.20                               |
|                | 3-Methylheptane        | 0.022 | 0.018   | 0.005                              | 0.060                               | 14.00                               |
|                | n-Octane               | 0.059 | 0.040   | 0.013                              | 0.143                               | 8.11                                |
|                | Nonane                 | 0.045 | 0.026   | 0.008                              | 0.086                               | 9.70                                |
|                | n-Decane               | 0.057 | 0.036   | 0.010                              | 0.175                               | 11.00                               |
|                | n-Undecane             | 0.024 | 0.019   | 0.007                              | 0.053                               | 12.30                               |
|                | n-Dodecane             | 0.023 | 0.018   | 0.006                              | 0.051                               | 13.20                               |
|                | 1-Hexene               | 0.058 | 0.037   | 0.009                              | 0.149                               | 37.00                               |
| ethene         | 1.700                  | 1.330 | 0.451   | 3.885                              | 7.80                                |                                     |
| propene        | 0.597                  | 0.430 | 0.112   | 1.530                              | 29.00                               |                                     |
| trans-2-Butene | 0.060                  | 0.040 | 0.008   | 0.151                              | 64.00                               |                                     |
| 1-Butene       | 0.168                  | 0.131 | 0.033   | 0.435                              | 31.00                               |                                     |

|      |                        |       |       |       |        |        |
|------|------------------------|-------|-------|-------|--------|--------|
|      | cis-2-Butene           | 0.060 | 0.038 | 0.008 | 0.149  | 56.00  |
|      | trans-2-Pentene        | 0.029 | 0.019 | 0.005 | 0.079  | 67.00  |
|      | 1-Pentene              | 0.061 | 0.043 | 0.012 | 0.163  | 31.40  |
|      | cis-2-Pentene          | 0.045 | 0.031 | 0.010 | 0.116  | 65.00  |
|      | Isoprene               | 0.749 | 0.492 | 0.111 | 1.940  | 100.00 |
|      | Acetylene              | 0.888 | 0.771 | 0.245 | 1.976  | 0.75   |
|      | Benzene                | 0.280 | 0.241 | 0.082 | 0.647  | 1.20   |
|      | Toluene                | 0.746 | 0.590 | 0.183 | 1.709  | 5.60   |
|      | Ethylbenzene           | 0.197 | 0.169 | 0.048 | 0.403  | 7.00   |
|      | m,p-Xylene             | 0.705 | 0.528 | 0.151 | 1.612  | 23.10  |
|      | Styrene                | 0.057 | 0.047 | 0.020 | 0.119  | 58.00  |
|      | o-Xylene               | 0.329 | 0.247 | 0.072 | 0.767  | 13.60  |
|      | Isopropylbenzene       | 0.009 | 0.008 | 0.002 | 0.022  | 6.30   |
|      | n-Propylbenzene        | 0.030 | 0.022 | 0.007 | 0.066  | 5.80   |
|      | m-Ethyltoluene         | 0.069 | 0.053 | 0.016 | 0.154  | 18.60  |
|      | p-Ethyltoluene         | 0.029 | 0.022 | 0.006 | 0.060  | 11.80  |
|      | 1,3,5-Trimethylbenzene | 0.042 | 0.032 | 0.007 | 0.104  | 56.70  |
|      | 1,2,4-Trimethylbenzene | 0.147 | 0.113 | 0.035 | 0.328  | 32.50  |
|      | 1,2,3-Trimethylbenzene | 0.057 | 0.042 | 0.013 | 0.132  | 32.70  |
|      | o-Ethyltoluene         | 0.029 | 0.022 | 0.007 | 0.061  | 11.90  |
|      | m-Diethylbenzene       | 0.031 | 0.018 | 0.005 | 0.091  | 22.00  |
|      | p-Diethylbenzene       | 0.035 | 0.021 | 0.005 | 0.097  | 16.00  |
|      | $\alpha$ -piene        | 0.088 | 0.069 | 0.021 | 0.221  | 54.00  |
|      | $\beta$ -piene         | 0.088 | 0.069 | 0.021 | 0.221  | 76.00  |
|      | Limonene               | 0.176 | 0.137 | 0.043 | 0.441  | 165.00 |
| OVOC | Formaldehyde           | 0.703 | 0.385 | 0.004 | 2.203  | 9.40   |
|      | Methanol               | 8.349 | 7.511 | 3.378 | 15.324 | 0.94   |
|      | Acetaldehyde           | 1.917 | 1.762 | 0.742 | 3.558  | 15.00  |
|      | Acetone                | 3.775 | 3.561 | 1.908 | 6.322  | 0.17   |
|      | MEK                    | 0.763 | 0.715 | 0.309 | 1.365  | 1.10   |
|      | Hydroxyacetone         | 0.738 | 0.617 | 0.170 | 1.763  | 5.90   |
|      | Phenol                 | 0.008 | 0.007 | 0.001 | 0.015  | 27.00  |
|      | MVK                    | 0.603 | 0.518 | 0.102 | 1.377  | 20.00  |
|      | MACR                   | 0.314 | 0.289 | 0.075 | 0.661  | 29.00  |

\* The unit is ppb.

\*\* The unit is  $\text{cm}^3 \text{molecule}^{-1} \text{s}^{-1}$ .

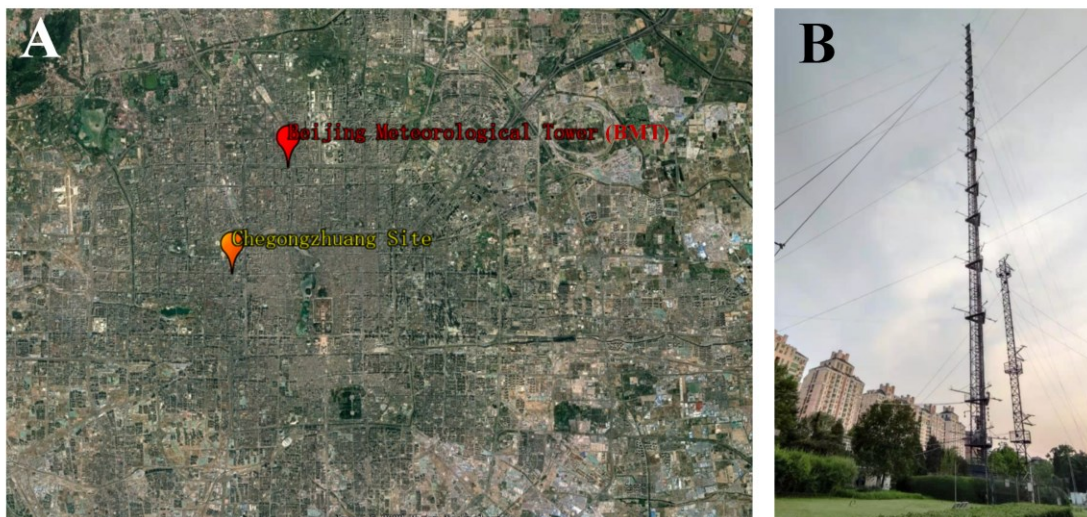

**Figure S1.** (A) Map showing locations of the Beijing Meteorological Tower (BMT) and the Chegongzhuang sites. (B) Picture showing the BMT. Note that the map in panel (A) was extracted from © Google Maps by the authors and the photo in panel (B) was taken by the authors.

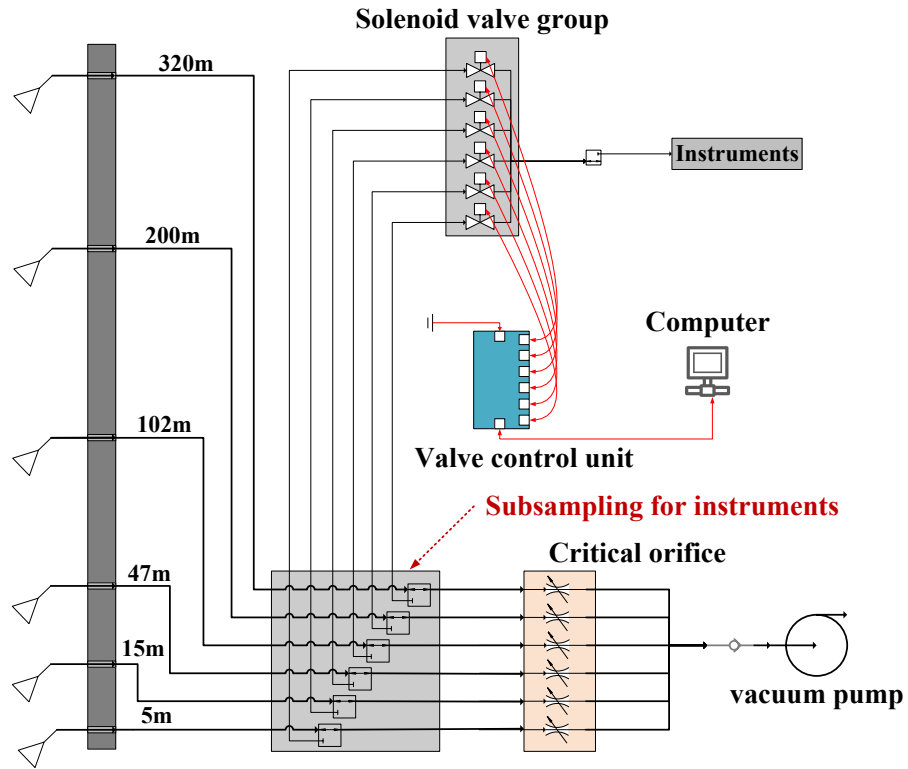

**Figure S2.** A simple schematic illustration of the vertical observation system on the BMT.

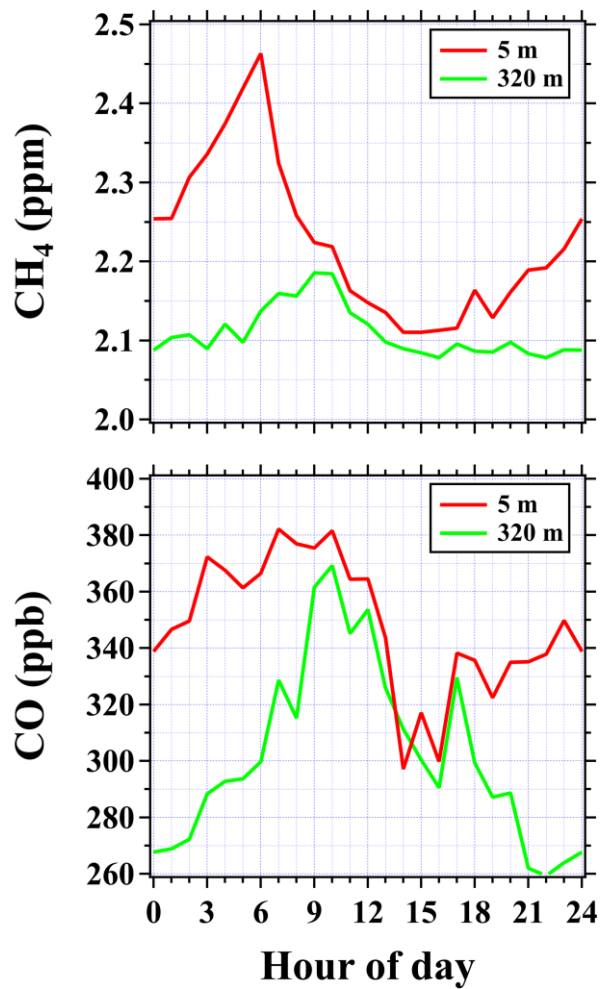

**Figure S3.** Average diurnal profiles of CH<sub>4</sub> and CO at 5 and 320 m on BMT during the campaign.



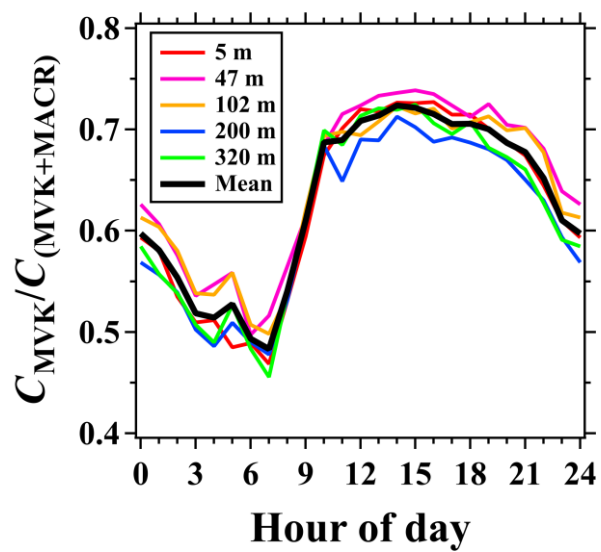

**Figure S4.** Average diurnal profiles of the concentration ratios of MVK to MVK+MACR ( $m/z$  71,  $C_4H_6OH^+$ ) at different altitudes measured by PTR-ToF-MS using the  $NO^+$  mode from July 14 to August 4, 2021.

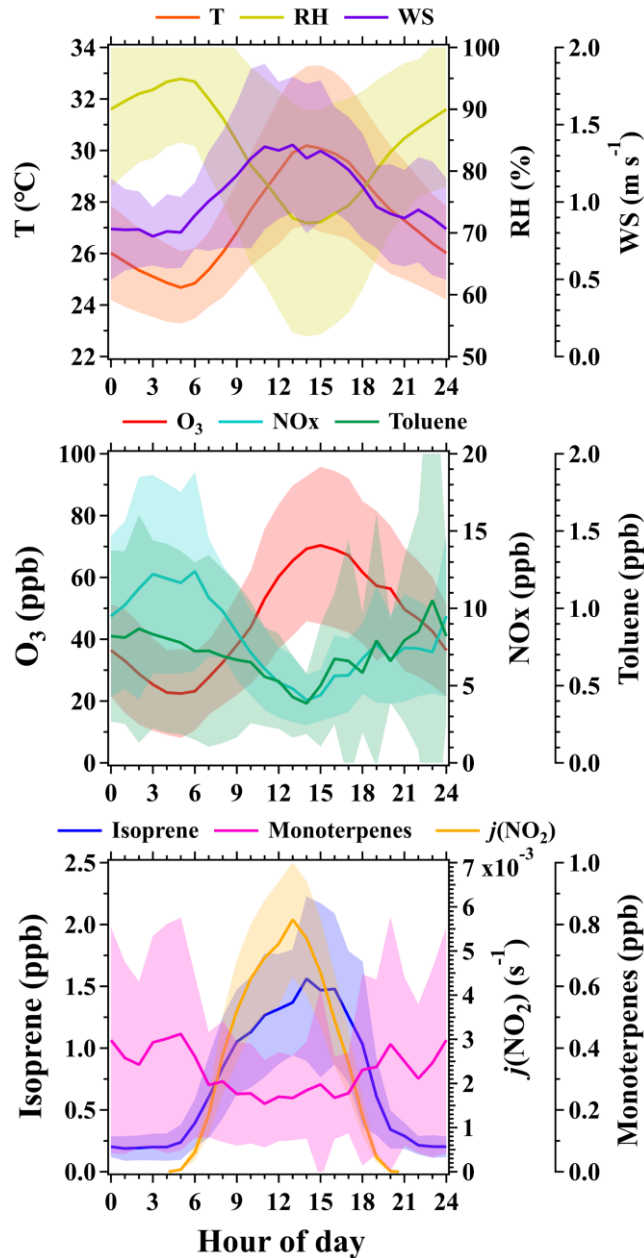

**Figure S5.** Average diurnal profiles of meteorological parameters, ozone, and precursor gases along with  $j(\text{NO}_2)$  at ground level during the campaign.

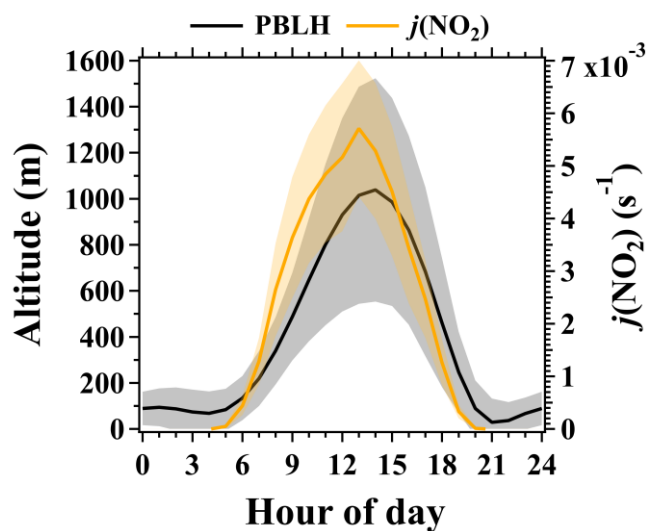

**Figure S6.** Average diurnal profiles of PBLH and  $j(\text{NO}_2)$  at the BMT site during the campaign.

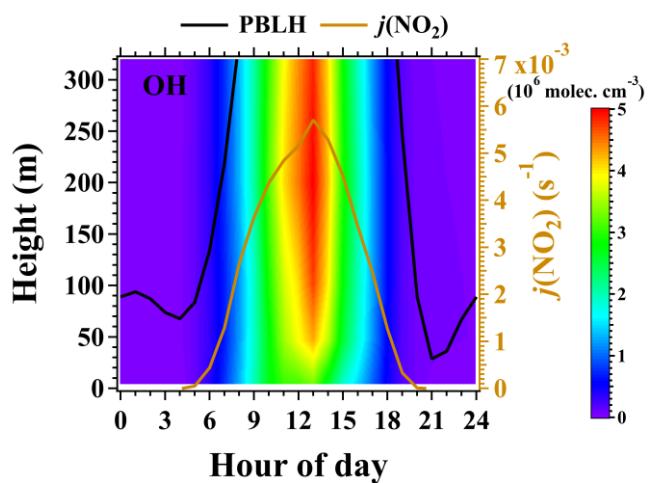

**Figure S7.** Average diurnal and vertical variations in concentrations of OH radical obtained from the box model results during the campaign.
